# Supplementary material for: Chemosensitivity enhanced by autophagy inhibition based on a polycationic nano-drug carrier
Source: Royal Society of Chemistry journal article supplement (doi:10.1039/d0na00990c), 2021-01-01
Supplement: d0na00990c1.pdf [file d0na00990c1.pdf]

## **Chemosensitivity Enhanced by Autophagy Inhibition Based on Polycationic Nano Drug Carrier**

**Na Li<sup>a#</sup>, Shangcong Han<sup>a#</sup>, Baohua Ma<sup>b</sup>, Xia Huang<sup>a</sup>, Lisa Xu<sup>c</sup>, Jie Cao<sup>a</sup>, Yong Sun<sup>a\*</sup>**

a. Department of Pharmaceutics, School of Pharmacy, Qingdao University, Qingdao, China

b. Department of Pharmacy, Qingdao Central Hospital, Qingdao, China

c. School of Public Health, Qingdao University, Qingdao, China

\*Corresponding Author: E-mail: sunyong@qdu.edu.cn (Yong Sun)

# These authors contributed equally in this work

## Supporting Information

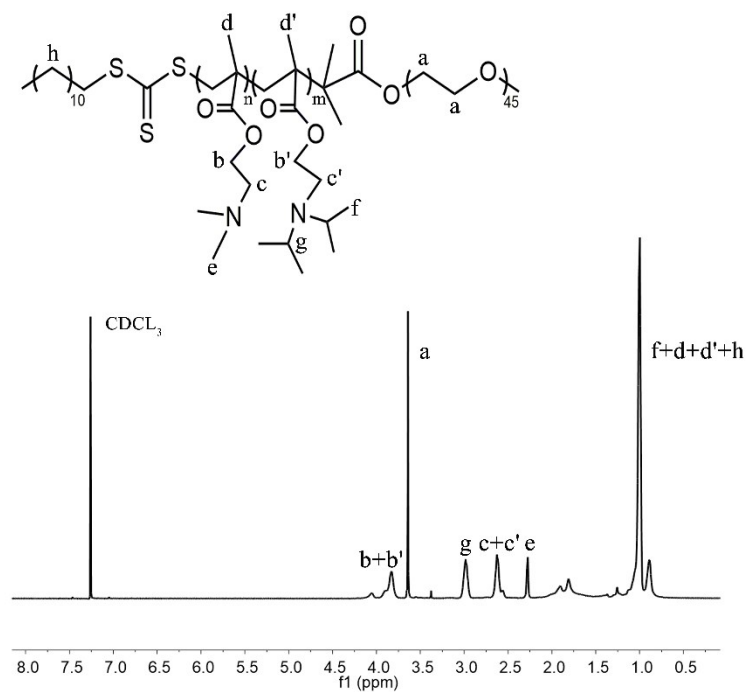

**Figure S1.** The <sup>1</sup>H NMR spectrum of mPEG-b-P(DPA-b-DMAEMA).

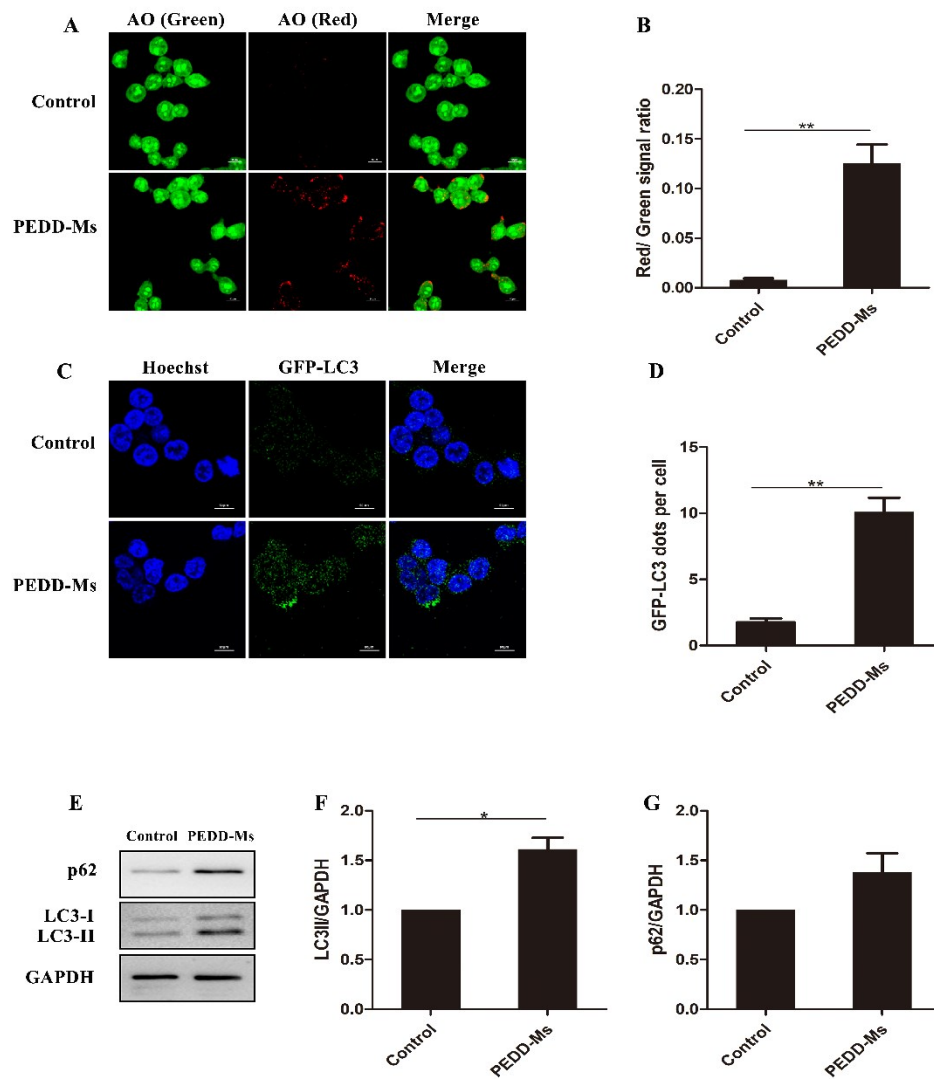

**Figure S2.** The AO-staining images (A) and the corresponding quantitative analysis (B) of HEK-293T cells treated with 100  $\mu\text{g}/\text{mL}$  PEDD-Ms for 24 h or without treatment. After treated with PEDD-Ms, the representative confocal images (C) of HEK-293T cells that stably expressed GFP-LC3 were obtained and analyzed quantitatively (D). The protein bands (E) and the semi-quantified results of LC3 (F) and p62 (G) of treated and non-treated HEK-293T cells ( $n = 3$ ). \*  $p < 0.05$ , \*\*  $p < 0.01$ .
